# Supplementary material for: Categorizing diffuse parenchymal lung disease in children
Source: Springer Nature journal article supplement (doi:10.1186/s13023-015-0339-1), 2015-09-25
Supplement: MOESM2 [file 9776258]

**Algorithm used in the Kids lung register (KLR) for the categorization of cases with suspected DPLD**

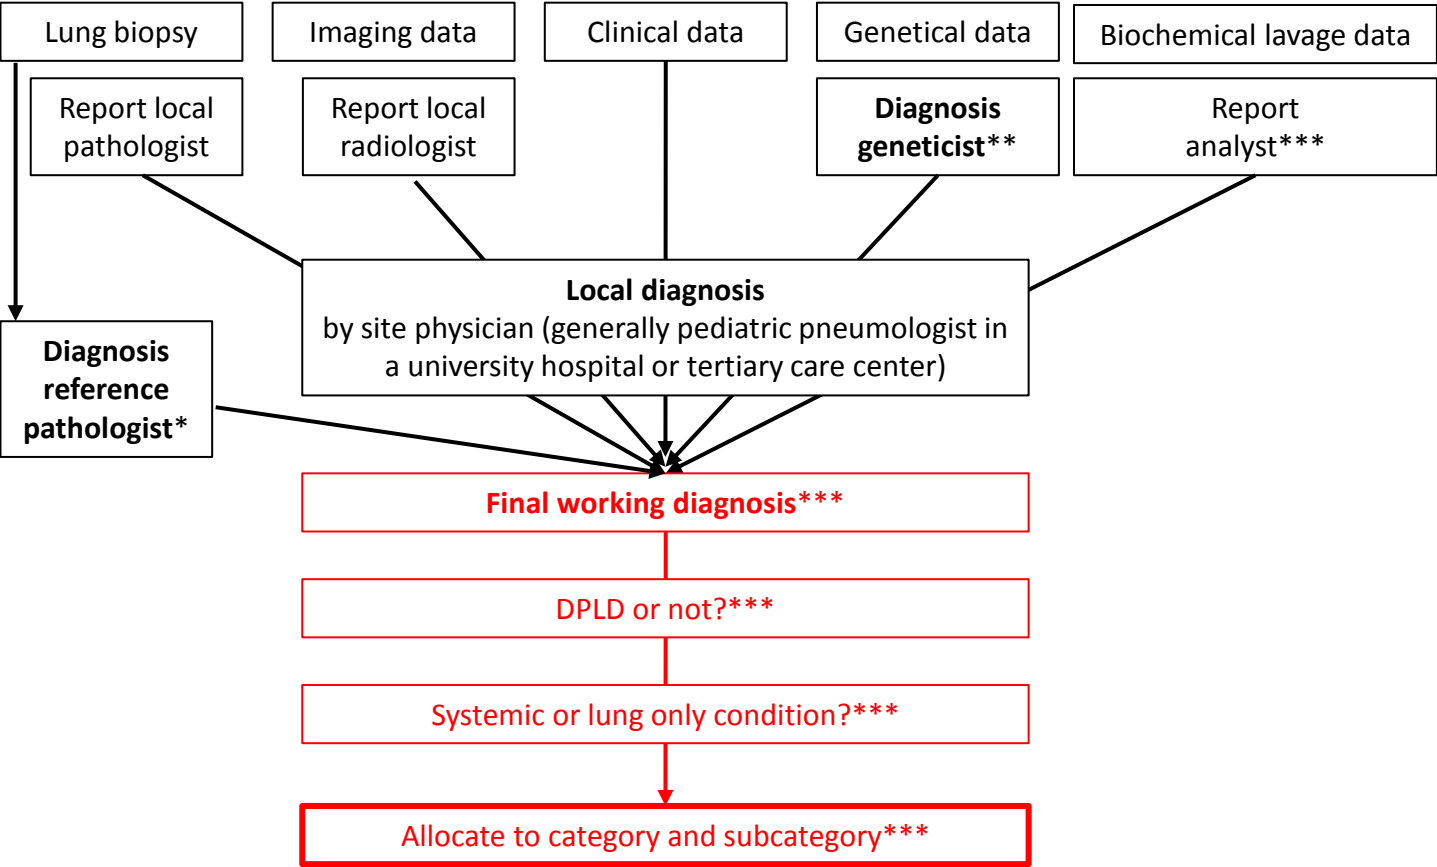

Routine work-flow used in the Kids lung register (KLR) to obtain a final working diagnosis and to categorize and subcategorize cases with suspected DPLD (black and red). The work-flow used for re-rating is depicted in red.

\*reference pathologist was Frank Brasch, \*\*genetical diagnosis was made by Peter Lohse and \*\*\*lavage report on surfactant protein analysis, as well as the establishment of the final working diagnosis during routine KLR workflow were done by Matthias Griese
